# Supplementary material for: Metallacrowns of Ni(ii) with α-aminohydroxamic acids in aqueous solution: beyond a 12-MC-4, an unexpected (vacant?) 15-MC-5
Source: Royal Society of Chemistry journal article supplement (doi:10.1039/c0dt00832j), 2011-01-01
Supplement: c0dt00832j.pdf [file c0dt00832j.pdf]

**METALLACROWNS OF Ni(II) WITH  $\alpha$ -AMINOHYDROXAMIC ACIDS  
IN AQUEOUS SOLUTION:  
BEYOND A 12-MC-4, AN UNEXPECTED (VACANT?) 15-MC-5**

**Dimitri Bacco<sup>1</sup>, Valerio Bertolasi<sup>1,2</sup>, Francesco Dallavalle<sup>3</sup>, Lorenzo Galliera<sup>1</sup>, Nicola Marchetti<sup>1</sup>, Luciano Marchiò<sup>3</sup>, Maurizio Remelli<sup>1\*</sup>, Matteo Tegoni<sup>3\*</sup>**

<sup>1</sup>*Dipartimento di Chimica, Università di Ferrara, Via L. Borsari 46, 44121 Ferrara (Italy),  
Fax: +39 0532 240709, Tel: +39 0532 455150; E-mail: [maurizio.remelli@unife.it](mailto:maurizio.remelli@unife.it)*

<sup>2</sup>*Centro di Strutturistica Diffraattometrica, Università di Ferrara, Via L. Borsari 46, 44121  
Ferrara (Italy)*

<sup>3</sup>*Dipartimento di Chimica Generale e Inorganica, Chimica Analitica, Chimica Fisica,  
Università di Parma, Viale G.P. Usberti 17A, 43124 Parma (Italy), Fax: +39 0521 905557,  
Tel: +39 0521 905427; E-mail: [matteo.tegoni@unipr.it](mailto:matteo.tegoni@unipr.it)*

## SUPPLEMENTARY INFORMATION

**Scheme S1** Structures of the aminohydroxamic acids (S)- $\alpha$ -Alaha (left) and (S)-Valha (right).

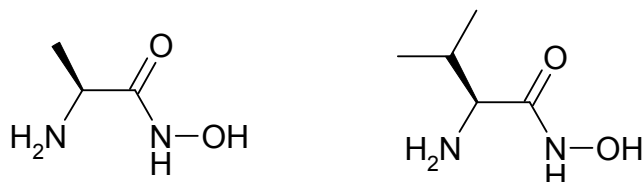

**Table S1** Overall thermodynamic complex-formation parameters in the system  $\text{Cu}^{2+}/\alpha$ -Alaha. Data from M. Tegoni, F. Dallavalle, B. Belosi, M. Remelli, Dalton Trans. **2004**, 1329-1333.

| SPECIES                                                        | $\log \beta$ | $-\Delta H^\circ$<br>(kJ mol <sup>-1</sup> ) | $\Delta S^\circ$<br>(J K <sup>-1</sup> mol <sup>-1</sup> ) |
|----------------------------------------------------------------|--------------|----------------------------------------------|------------------------------------------------------------|
| [CuL] <sup>+</sup>                                             | 10.76        | 33                                           | 95                                                         |
| [CuL <sub>2</sub> ]                                            | 19.84        | 66                                           | 158                                                        |
| [CuL <sub>2</sub> H <sub>-1</sub> ] <sup>-</sup>               | 9.82         | 46                                           | 34                                                         |
| [Cu <sub>5</sub> L <sub>4</sub> H <sub>4</sub> ] <sup>2+</sup> | 40.16        | 85                                           | 484                                                        |

**Table S2** Overall thermodynamic parameters for protonation of  $\alpha$ -Alaha, (*R,S*)-Valha and acetohydroxamic acid (Acha) in aqueous solution.  $T = 298.2$  K,  $I = 0.1$  mol dm<sup>-3</sup>. Background electrolytes: KCl, NaCl or (C<sub>2</sub>H<sub>5</sub>)<sub>4</sub>NCl. Standard deviation on last figure is given in parentheses. Literature data from Tegoni, M., L. Ferretti, et al. (2007), Chem-Eur. J., 13(4): 1300-1308 and Tegoni, M., M. Remelli, et al. (2008), Dalton Trans., (20): 2693-2701..

| Species                      | log $\beta$ | $-\Delta H^\circ/\text{kJ mol}^{-1}$ | $\Delta S^\circ/\text{J K}^{-1} \text{mol}^{-1}$ | log $\beta^\#$ | log $\beta^\#$                                    |
|------------------------------|-------------|--------------------------------------|--------------------------------------------------|----------------|---------------------------------------------------|
| $\alpha$ -Alaha              | KCl         |                                      |                                                  | NaCl           | (C <sub>2</sub> H <sub>5</sub> ) <sub>4</sub> NCl |
| LH                           | 9.15 (1)    | 27.3 (4)                             | 84 (1)                                           | 9.07 (2)       | 9.27 (1)                                          |
| LH <sub>2</sub> <sup>+</sup> | 16.48 (1)   | 62.8 (4)                             | 105 (1)                                          | 16.36 (3)      | 16.62 (1)                                         |
| ( <i>R,S</i> )-Valha         | KCl         |                                      |                                                  |                |                                                   |
| LH                           | 9.22 (1)    | 24.3 (9)                             | 95 (3)                                           | -              | -                                                 |
| LH <sub>2</sub> <sup>+</sup> | 16.43 (1)   | 57 (1)                               | 123 (4)                                          | -              | -                                                 |
| Acha                         | KCl         |                                      |                                                  |                |                                                   |
| LH                           | 9.35 (1)    | 22.4 (2)                             | 104.0 (6)                                        | -              | -                                                 |

<sup>#</sup>This work

**Figure S1** Time resolved Vis Spectra. Ni<sup>2+</sup> /  $\alpha$ -Alaha 1 : 1.2; C<sup>o</sup><sub>Ni</sub> = 6 mmol dm<sup>-3</sup>, pH = 8.5.

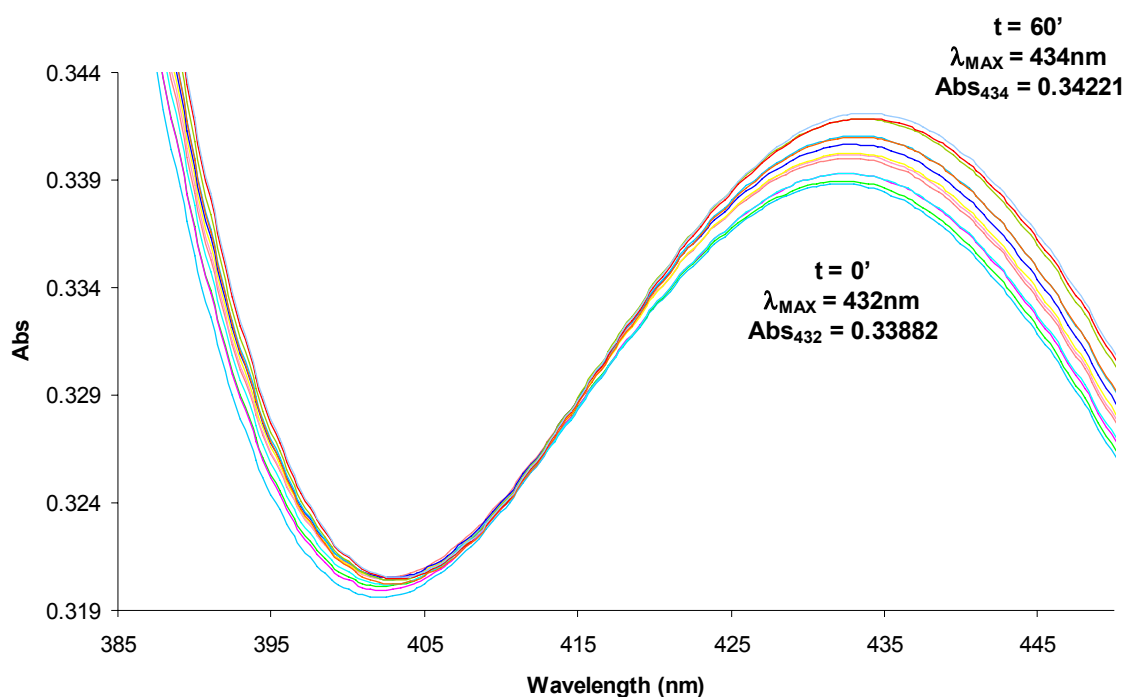

**Figure S2.** Example of curve fitting using different speciation models. System:  $\text{Ni}^{2+}$  /  $\alpha$ -Alaha 1 : 1.5;  $C_{\text{Ni}}^{\circ} = 4.4 \text{ mmol dm}^{-3}$ ;  $T = 298.2 \text{ K}$ ,  $I = 0.1 \text{ mol dm}^{-3}$  (KCl). Black symbols: experimental data; red line: fitting curve.

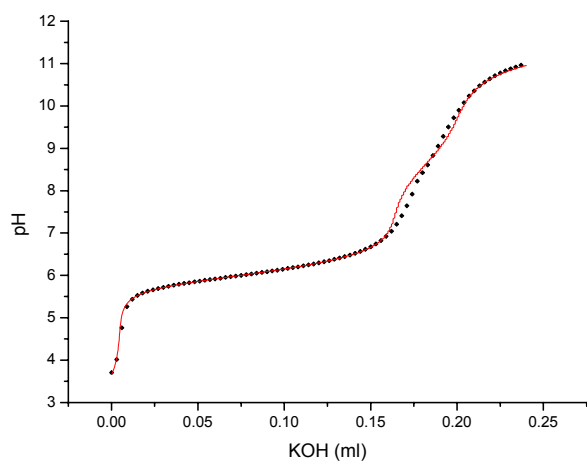

| Species                                     | $\log \beta$ |
|---------------------------------------------|--------------|
| $[\text{NiL}]^+$                            | 6.74 (2)     |
| $[\text{NiL}_2]$                            | 14.07 (1)    |
| $[\text{NiL}_2\text{H}_{-1}]^-$             | 5.49 (1)     |
| $[\text{Ni}_3\text{L}_4\text{H}_{-4}]^{2+}$ | -            |
| $[\text{Ni}_3\text{L}_5\text{H}_{-5}]$      | -            |
| $\sigma$                                    | 3.14         |
| $\chi^2$                                    | 75.1         |
| $n$                                         | 370          |

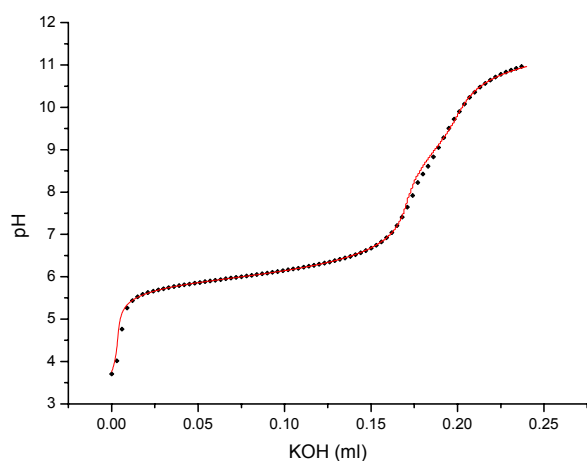

| Species                                     | $\log \beta$ |
|---------------------------------------------|--------------|
| $[\text{NiL}]^+$                            | 6.92 (7)     |
| $[\text{NiL}_2]$                            | 13.95 (1)    |
| $[\text{NiL}_2\text{H}_{-1}]^-$             | 5.00 (2)     |
| $[\text{Ni}_3\text{L}_4\text{H}_{-4}]^{2+}$ | 15.65 (3)    |
| $[\text{Ni}_3\text{L}_5\text{H}_{-5}]$      | -            |
| $\sigma$                                    | 2.00         |
| $\chi^2$                                    | 16.0         |
| $n$                                         | 370          |

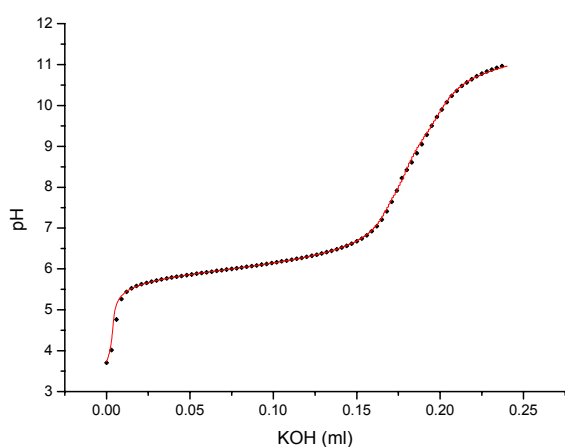

| Species                                     | $\log \beta$ |
|---------------------------------------------|--------------|
| $[\text{NiL}]^+$                            | 6.88 (1)     |
| $[\text{NiL}_2]$                            | 14.05 (1)    |
| $[\text{NiL}_2\text{H}_{-1}]^-$             | 4.88 (3)     |
| $[\text{Ni}_3\text{L}_4\text{H}_{-4}]^{2+}$ | 15.51 (5)    |
| $[\text{Ni}_3\text{L}_5\text{H}_{-5}]$      | 13.53 (8)    |
| $\sigma$                                    | 1.89         |
| $\chi^2$                                    | 8.3          |
| $n$                                         | 370          |

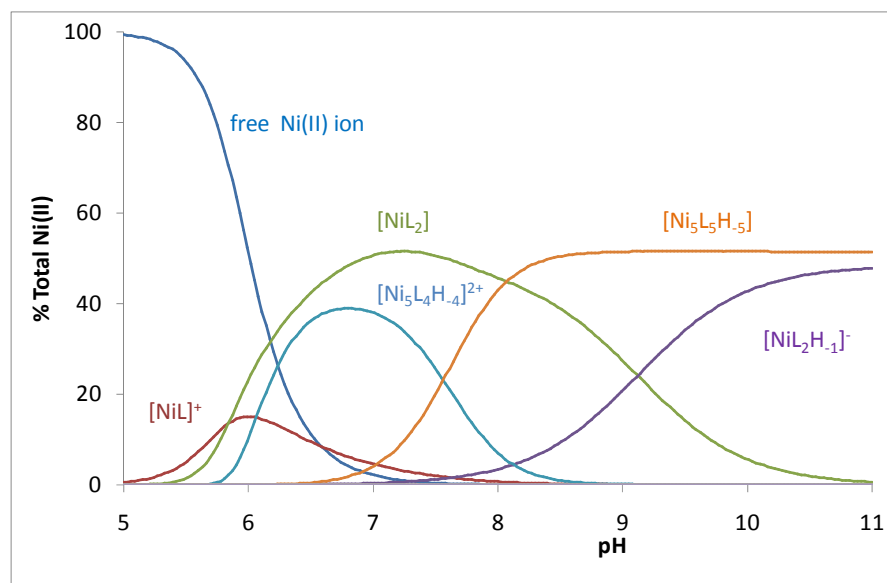

**Figure S3** Exemplificative distribution diagram for the system  $\text{Ni}^{2+}/\text{Valha}$  with ligand-to-metal ratio 1:1.5 and  $C_{\text{Ni}}^{\circ} = 2 \text{ mmol dm}^{-3}$

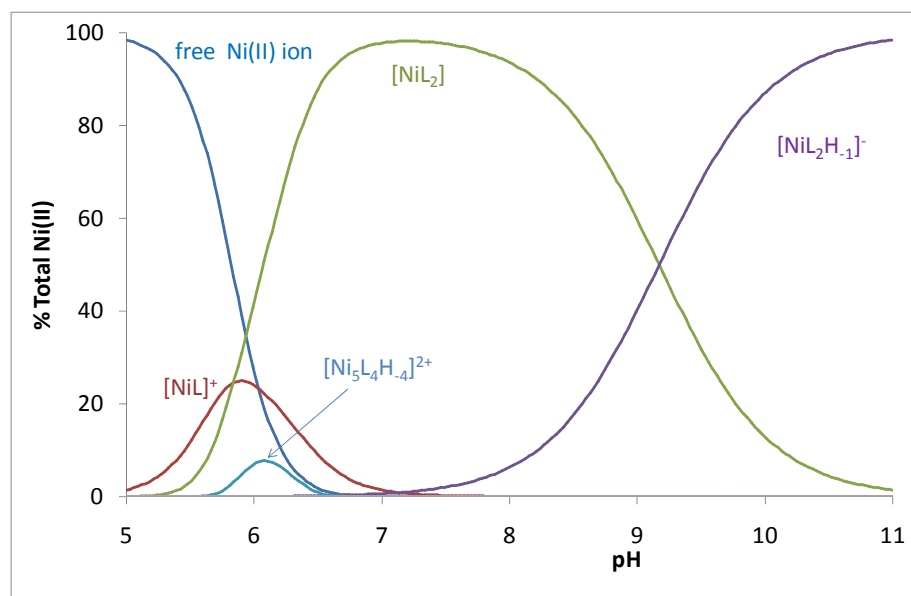

**Figure S4** Exemplificative distribution diagram for the system  $\text{Ni}^{2+}/\alpha\text{-Alaha}$  with ligand-to-metal ratio 1:3 and  $C_{\text{Ni}}^{\circ} = 2 \text{ mmol dm}^{-3}$

**Table S3.** Literature values for formation constants of Ni<sup>2+</sup> and Cu<sup>2+</sup> ML complexes with different chelating bidentate ligands [L. D. Pettit and H. K. J. Powell, in *Academic Software and IUPAC*, Royal Society of Chemistry, London, 1992-2000]

| Ligand          | Binding mode | Ni <sup>2+</sup> |                                           |                                                         | Cu <sup>2+</sup> |                                           |                                                         |
|-----------------|--------------|------------------|-------------------------------------------|---------------------------------------------------------|------------------|-------------------------------------------|---------------------------------------------------------|
|                 |              | log $\beta$      | $-\Delta H^\circ$<br>kJ mol <sup>-1</sup> | $\Delta S^\circ$<br>J K <sup>-1</sup> mol <sup>-1</sup> | log $\beta$      | $-\Delta H^\circ$<br>kJ mol <sup>-1</sup> | $\Delta S^\circ$<br>J K <sup>-1</sup> mol <sup>-1</sup> |
| Acha            | {O, O}       | 5.15             | -                                         | -                                                       | 7.85             | 13.5                                      | 105                                                     |
| glycine         | {N, O}       | 6.12             | 18.6                                      | 55                                                      | 8.50             | 25.9                                      | 76                                                      |
| ethylenediamine | {N, N}       | 7.54             | 37.7                                      | 18                                                      | 10.60            | 52.5                                      | 27                                                      |

**Figure S5.** Vis absorption spectra for the system Ni<sup>2+</sup>/ $\alpha$ -Alaha as a function of pH. a) ligand/metal ratio 8:1, C<sup>o</sup><sub>Ni</sub> = 1 mM; b) ligand/metal ratio 1:1 C<sup>o</sup><sub>Ni</sub> = 3 mmol dm<sup>-3</sup>.

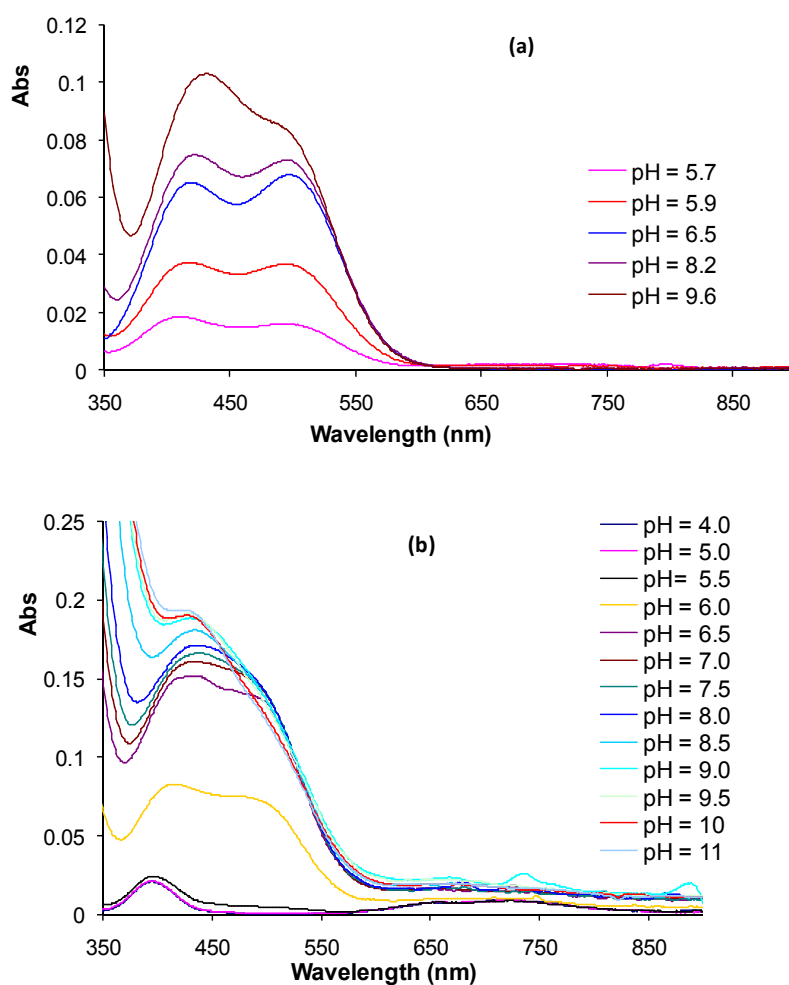

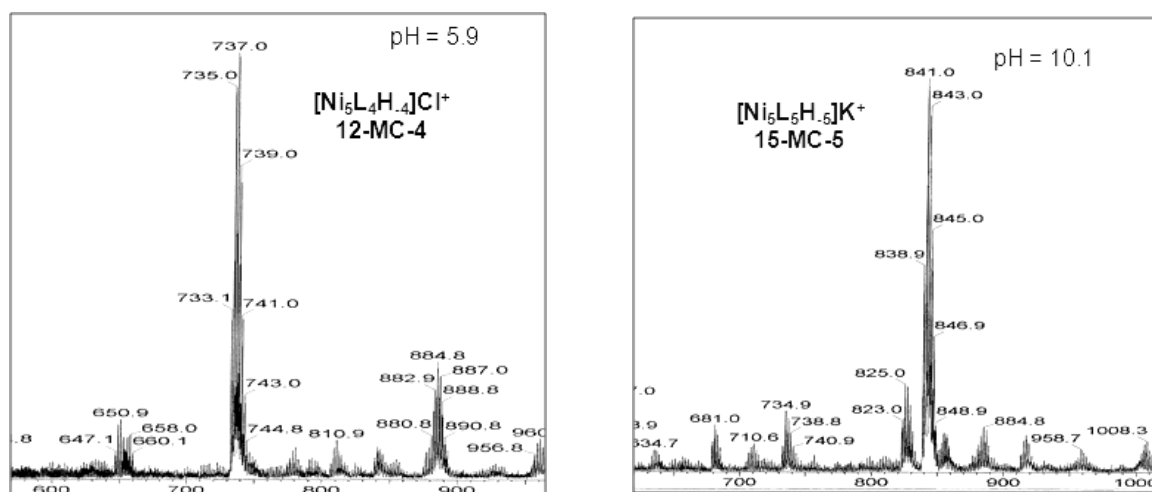

**Figure S6.** ESI-MS spectra for the Ni<sup>2+</sup> /  $\alpha$ -Alaha system in aqueous solution at pH 5.9 and 10.1, respectively. Base cation: K<sup>+</sup>.

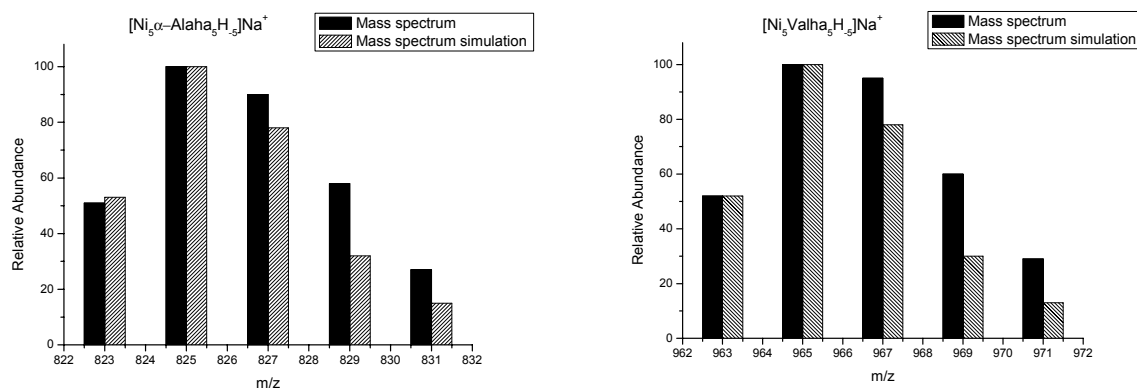

**Figure S7.** Comparison between experimental and calculated isotopic distributions for Ni(II) 15-MC-5 with  $\alpha$ -Alaha and Valha.

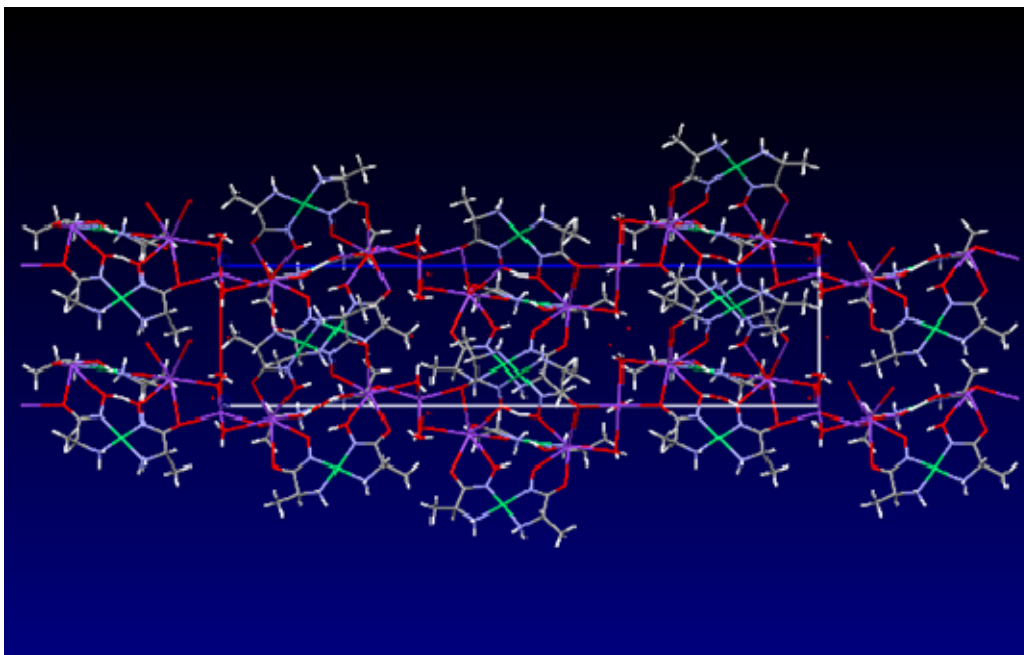

**Figure S8.** Unit cell packing viewed down the crystallographic *b* axis.
